# Supplementary material for: The STK33-Linked SNP rs4929949 Is Associated with Obesity and BMI in Two Independent Cohorts of Swedish and Greek Children
Source: PubMed Central journal article supplement (PMC3744548; doi:10.1371/journal.pone.0071353), 2013-08-15

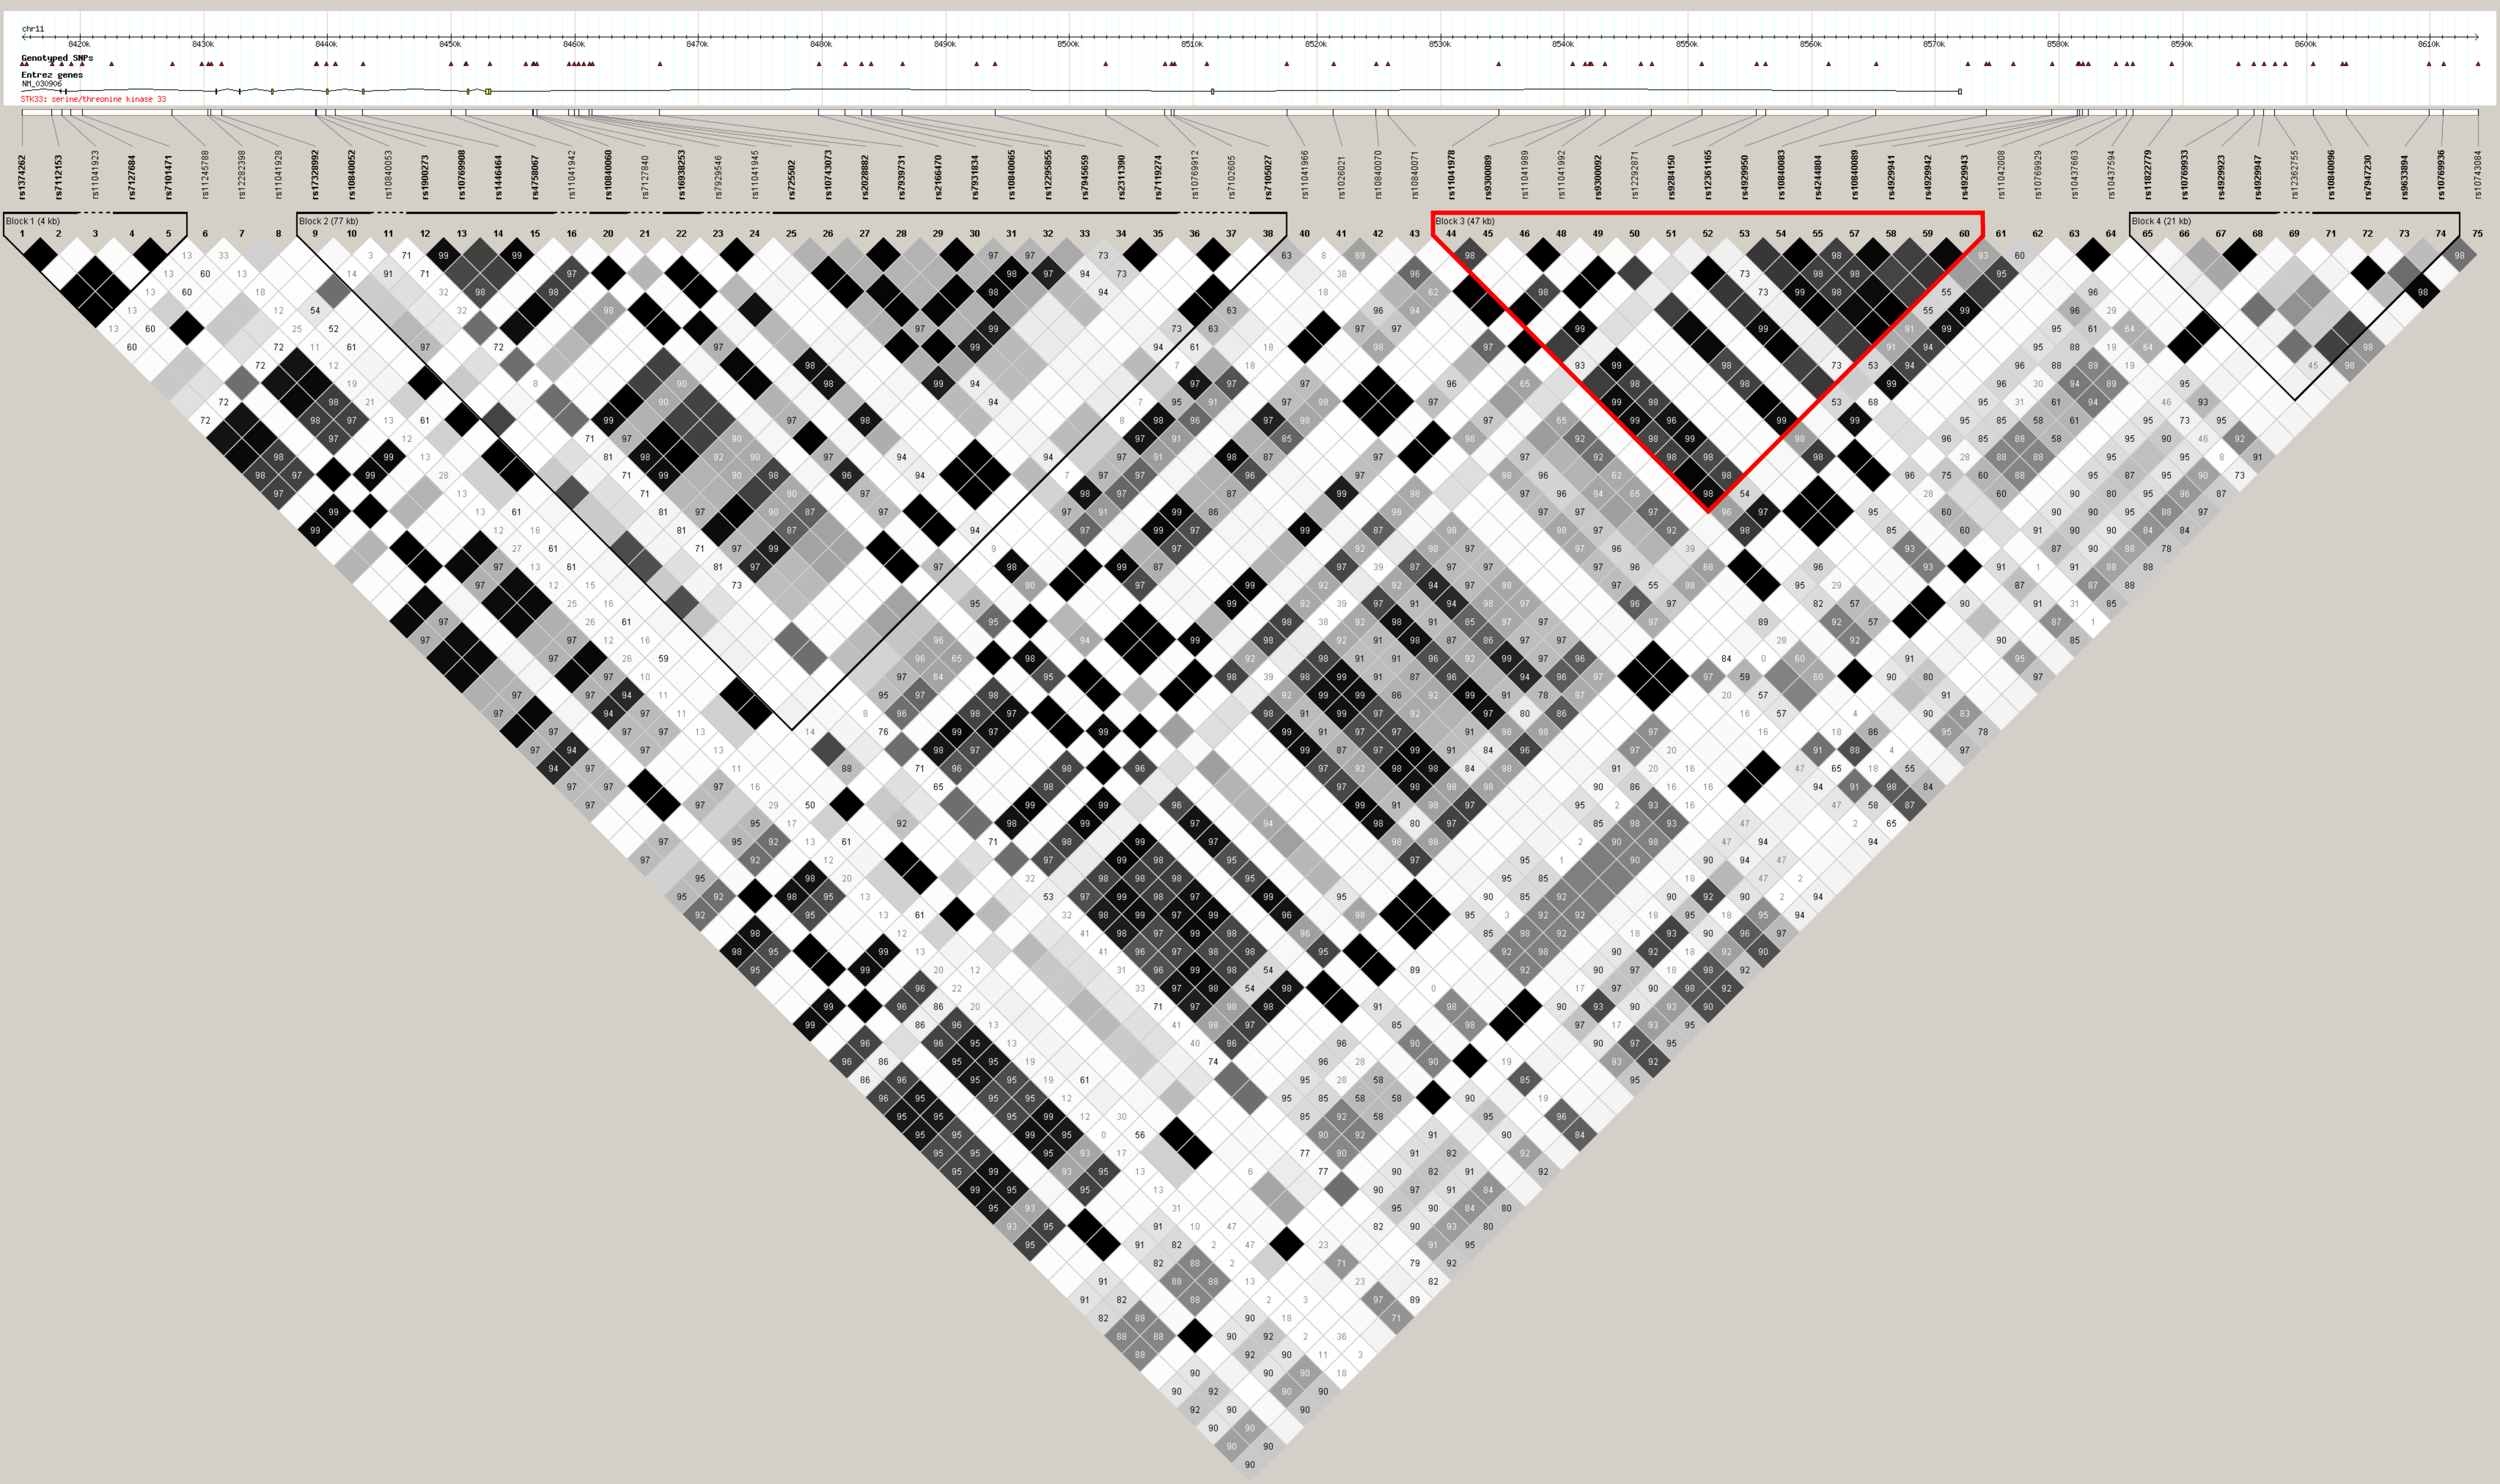

Supplement: pone.0071353.s001.pdf [file pone.0071353.s001.pdf]
